# Supplementary material for: The Mobility of Eurasian Avian-like M2 Is Determined by Residue E79 Which Is Essential for Pathogenicity of 2009 Pandemic H1N1 Influenza Virus in Mice
Source: MDPI journal article supplement (doi:10.3390/v15122365), 2023-11-30
Supplement: s1 [file s1]

Figure S1

SWISS-MODEL prediction

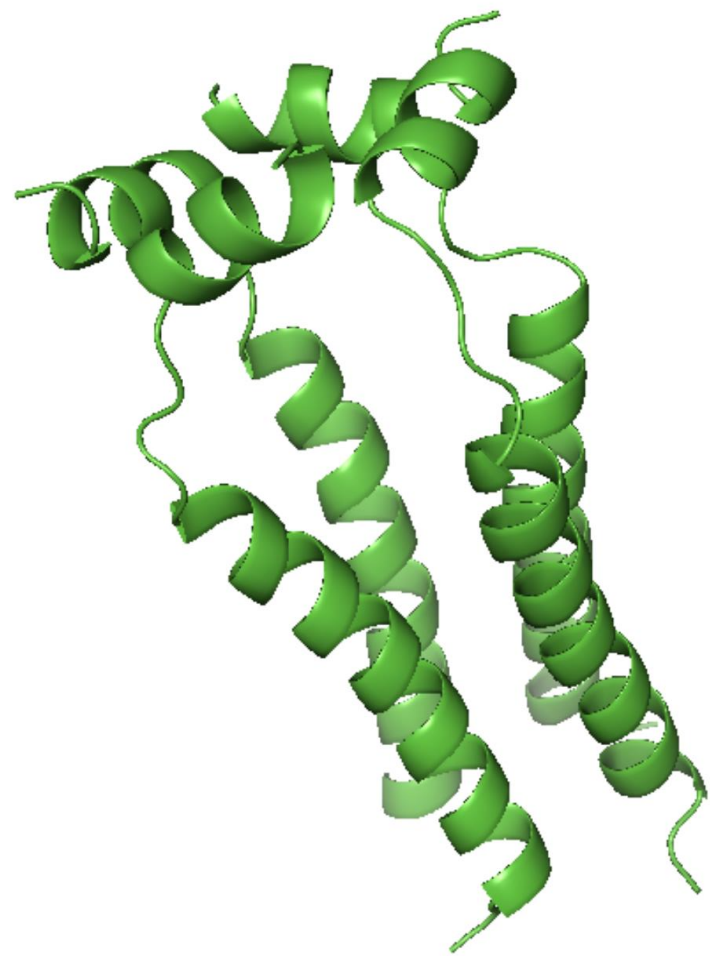

M2-E79K

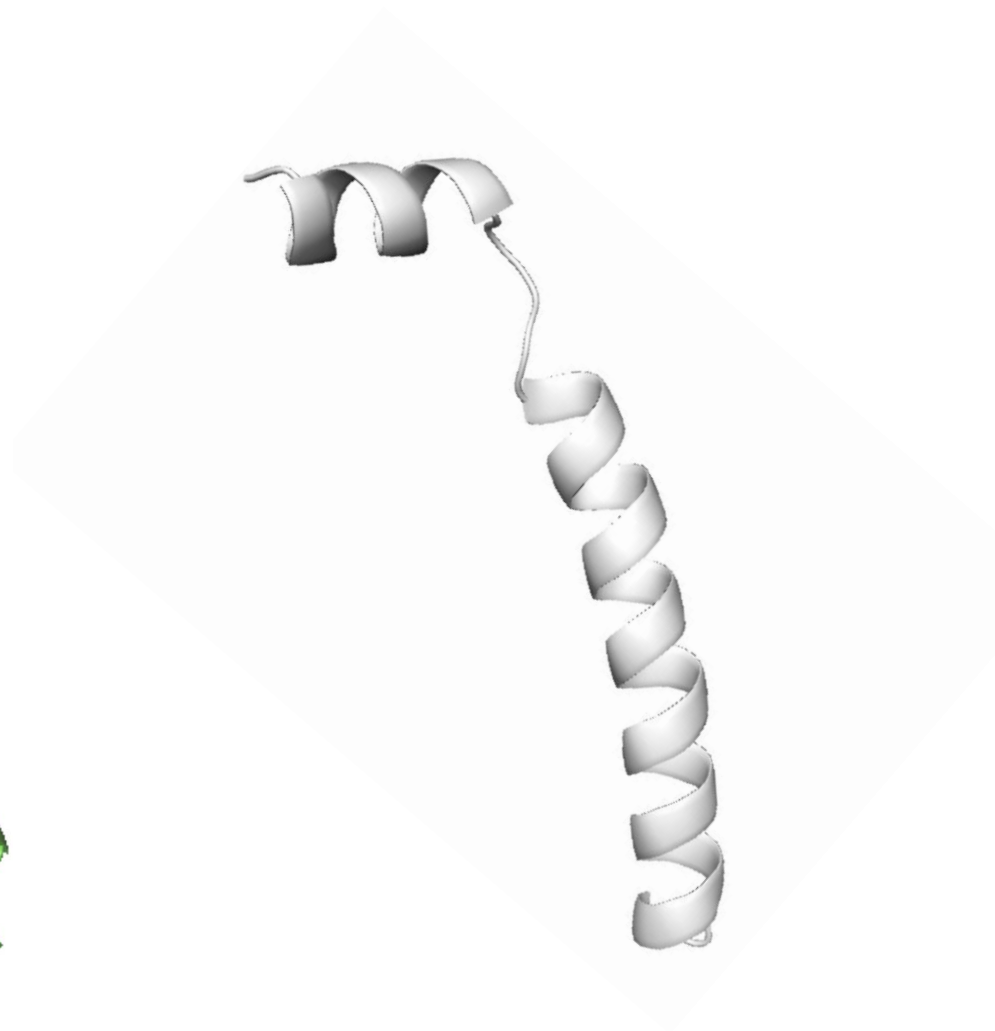

M2-WT

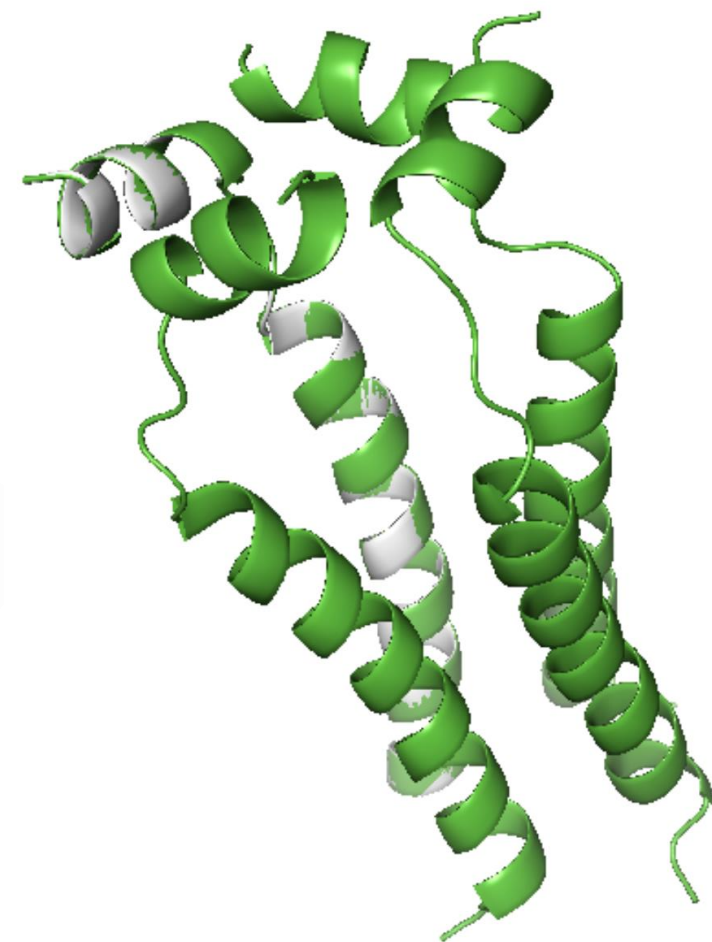

Pymol overlap

Figure S2

AlphaFold2 prediction

M2-E79K

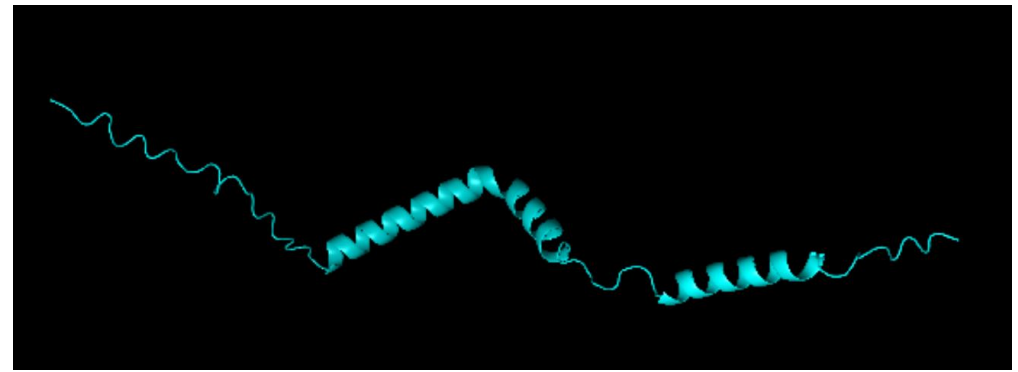

M2-WT

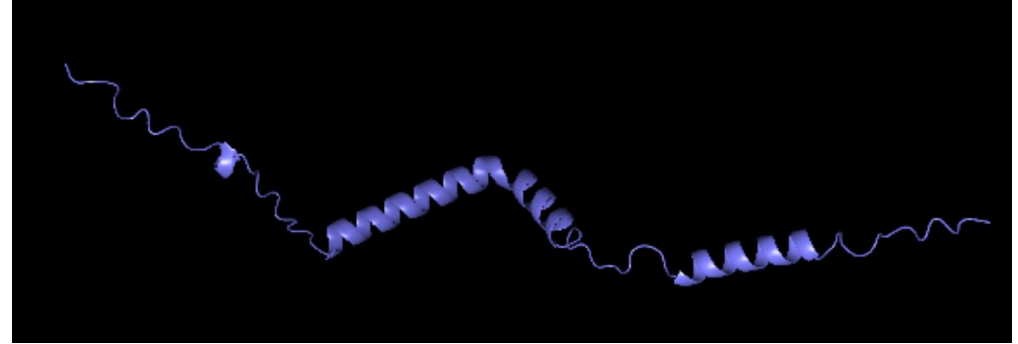

Pymol overlap

M2-79: red spots

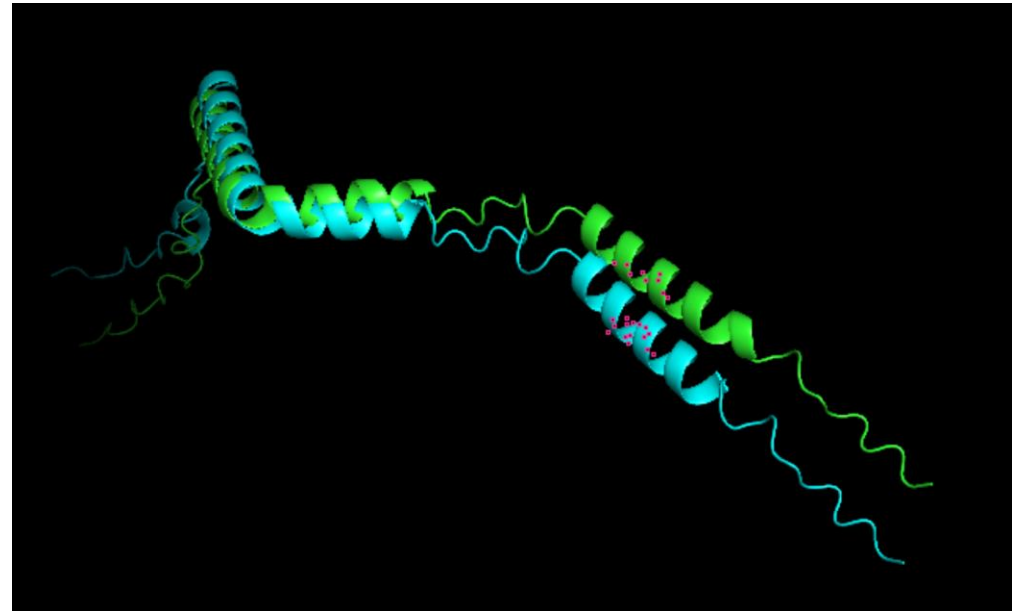

Figure S3

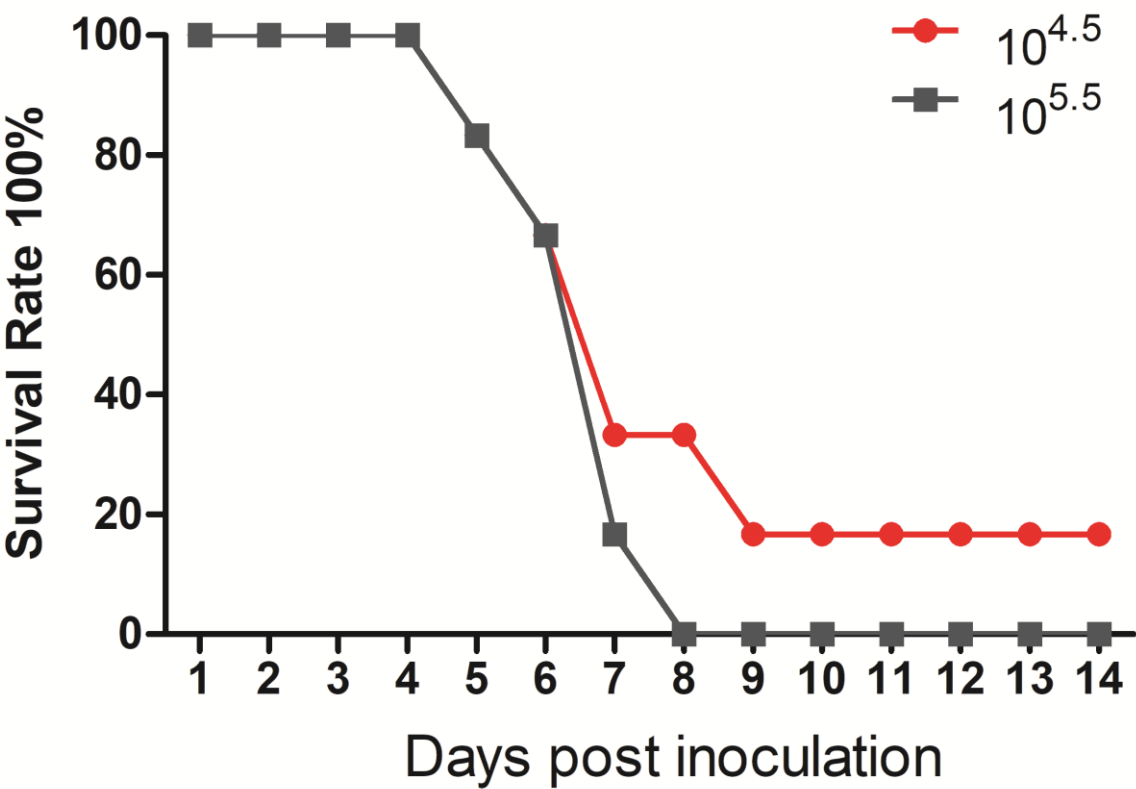

The survival rates of mice inoculated with different doses of CA09 influenza virus. Mice were intranasally challenged with  $10^{4.5}$  TCID<sub>50</sub> and  $10^{5.5}$  TCID<sub>50</sub>. The dose of  $10^{5.5}$  TCID<sub>50</sub> resulted in 100% mortality, whereas 16.7% mice survived with the challenge dose of  $10^{4.5}$  TCID<sub>50</sub>.
